# Supplementary material for: Environmentally sustainable oil-in-water (O/W) emulsion mud system for shale formation using vegetable oil
Source: Research Square preprint supplement (doi:10.21203/rs.3.rs-7805919/v1), 2025-10-29
Supplement: Supplementary file 1 [file 887b44bc381ea918bcd1b642.docx]

**Table S1**. Physical properties of corn oil and diesel oil

| Properties | Corn oil | Diesel oil |
| --- | --- | --- |
| Flash Point, ºC | 335 | 69 |
| Fire Point, ºC | 365 | 70 |
| Cloud Point, ºC | − 14 | 4.3 |
| Pour point, ºC | − 12 | 3.3 |
| Viscosity, mPa s | 30 | 3.8 |
| Density, g/mL | 0.90 | 0.80 |

Please add this Table S1
